# Supplementary material for: Dietary intake of advanced glycation endproducts and risk of hepatobiliary cancers: A multinational cohort study
Source: PubMed Central journal article supplement (PMC8360042; doi:10.1002/ijc.33612), 2021-05-06

## Supporting Information

### **Dietary intake of advanced glycation endproducts (AGEs) and risk of hepatobiliary cancers: a multinational cohort study**

Ana-Lucia Mayén; Elom K. Aglago; Viktoria Knaze; Reynalda Cordova; Casper G. Schalkwijk; Karl-Heinz Wagner; Krasimira Aleksandrova; Veronika Fedirko; Pekka Keski-Rahkonen; Michael F. Leitzmann; Verena Katzke; Bernard Srouf; Matthias B. Schulze; Giovanna Masala; Vittorio Krogh; Salvatore Panico; Rosario Tumino; Bas Bueno-de-Mesquita; Magritt Brustad; Antonio Agudo; María Dolores Chirlaque López; Pilar Amiano; Bodil Ohlsson; Stina Ramne; Dagfinn Aune; Elisabete Weiderpass; Mazda Jenab; Heinz Freisling

#### **Table of Contents**

**Supplementary Table 1.** Intake of food groups according to tertiles of dietary intake of advanced glycation endproducts (AGEs).

**Supplementary Table 2.** Hazard ratios (95% confidence intervals) for hepatocellular cancer according to tertiles of dietary intake of advanced glycation endproducts (AGEs).

**Supplementary Table 3.** Hazard ratios (95% confidence intervals) for hepatobiliary cancer subsites according to tertiles of dietary CML intake.

**Supplementary Table 4.** Hazard ratios (95% confidence intervals) for hepatobiliary cancer subsites according to tertiles of dietary CEL intake.

**Supplementary Table 5.** Hazard ratios (95% confidence intervals) for hepatobiliary cancer subsites according to tertiles of dietary MG-H1 intake.

**Supplementary Table 6.** Sensitivity analyses showing hazard ratios (95% confidence intervals) for hepatocellular carcinoma according to dietary intake of advanced glycation endproducts (AGEs).

**Supplementary Table 7.** Sensitivity analyses showing hazard ratios (95% confidence intervals) for gallbladder cancer according to dietary intake of advanced glycation endproducts (AGEs).

**Supplementary Figure 1.** Flowchart for participant inclusion criteria.

**Supplementary Figure 2.** Food group sources of dietary intake of advanced glycation endproducts in the European Prospective Investigation into Cancer and nutrition (EPIC).

**Supplementary Figure 3.** Percentage contribution of food groups to CML, CEL and MG-H1 intake in the European Prospective Investigation into Cancer and nutrition (EPIC) study.

**Supplementary Figure 4.** Subgroup analysis showing hazard ratios (HR) and 95% confidence intervals (CI) for hepatocellular carcinoma according to dietary intake of CEL.

**Supplementary Figure 5.** Subgroup analysis showing hazard ratios (HR) and 95% confidence intervals (CI) for hepatocellular carcinoma according to dietary intake of CML.

**Supplementary Figure 6.** Subgroup analysis showing hazard ratios (HR) and 95% confidence intervals (CI) for hepatocellular carcinoma according to dietary intake of MG-H1.

**Supplementary Figure 7.** Subgroup analysis by country showing hazard ratios (HR) and 95% confidence intervals (CI) for hepatocellular carcinoma according to dietary intake of advanced glycation endproducts (AGEs)

**Supplementary Figure 8.** Subgroup analysis by country showing hazard ratios (HR) and 95% confidence intervals (CI) for gallbladder cancer according to dietary intake of advanced glycation endproducts (AGEs)

**Supplementary Figure 9.** Three-knot spline model for associations between energy-adjusted dietary intake of AGEs and risk of gallbladder cancer.

**Supplementary Figure 10.** Associations between dietary AGEs (per 1 SD increment) and HCC censoring every 2 years of follow-up.

**Supplementary Table 1.** Intake of food groups according to tertiles of dietary intake of advanced glycation endproducts (AGEs)<sup>1</sup> in the European Prospective Investigation into Cancer and nutrition, 1992-2000 (n=450,111).

| Food group<br>(g)         | CML       |           |           | CEL       |           |           | MG-H1     |           |           |
|---------------------------|-----------|-----------|-----------|-----------|-----------|-----------|-----------|-----------|-----------|
|                           | T1        | T2        | T3        | T1        | T2        | T3        | T1        | T2        | T3        |
| Red and processed meat    | 89 ± 44   | 114 ± 50  | 151 ± 83  | 84 ± 38   | 118 ± 57  | 167 ± 78  | 96 ± 47   | 127 ± 75  | 146 ± 74  |
| Cereals                   | 148 ± 64  | 233 ± 93  | 272 ± 133 | 184 ± 93  | 237 ± 123 | 251 ± 113 | 166 ± 75  | 238 ± 113 | 284 ± 128 |
| Dairy                     | 325 ± 294 | 369 ± 276 | 371 ± 221 | 368 ± 271 | 347 ± 313 | 331 ± 197 | 366 ± 324 | 350 ± 220 | 323 ± 195 |
| Fish                      | 26 ± 21   | 36 ± 26   | 41 ± 34   | 27 ± 22   | 32 ± 23   | 47 ± 36   | 27 ± 21   | 37 ± 27   | 44 ± 35   |
| Potatoes and other tubers | 127 ± 104 | 111 ± 103 | 94 ± 69   | 126 ± 104 | 103 ± 102 | 106 ± 66  | 126 ± 102 | 111 ± 104 | 91 ± 64   |
| Vegetables                | 150 ± 103 | 160 ± 86  | 171 ± 124 | 151 ± 102 | 162 ± 109 | 167 ± 107 | 152 ± 100 | 157 ± 110 | 174 ± 111 |
| Legumes                   | 12 ± 25   | 12 ± 24   | 12 ± 32   | 10 ± 22   | 13 ± 27   | 13 ± 33   | 10 ± 22   | 14 ± 27   | 14 ± 34   |
| Fruits, nuts and seeds    | 220 ± 217 | 226 ± 159 | 220 ± 245 | 235 ± 222 | 213 ± 170 | 213 ± 242 | 211 ± 203 | 210 ± 172 | 254 ± 257 |
| Egg and egg products      | 22 ± 20   | 19 ± 14   | 17 ± 16   | 22 ± 19   | 20 ± 18   | 17 ± 14   | 22 ± 19   | 17 ± 14   | 18 ± 16   |
| Fat                       | 33 ± 19   | 31 ± 17   | 30 ± 16   | 31 ± 18   | 33 ± 17   | 30 ± 18   | 30 ± 17   | 32 ± 18   | 32 ± 18   |
| Sugar and confectionary   | 70 ± 99   | 51 ± 68   | 39 ± 46   | 64 ± 96   | 56 ± 76   | 42 ± 45   | 68 ± 92   | 45 ± 49   | 44 ± 74   |
| Cakes and biscuits        | 18 ± 21   | 30 ± 25   | 62 ± 67   | 21 ± 20   | 33 ± 32   | 64 ± 71   | 19 ± 22   | 45 ± 44   | 58 ± 68   |
| Soups, bouillons          | 23 ± 44   | 42 ± 70   | 48 ± 70   | 35 ± 58   | 39 ± 66   | 41 ± 69   | 33 ± 57   | 39 ± 73   | 44 ± 62   |
| Condiments and sauces     | 11 ± 13   | 20 ± 22   | 23 ± 19   | 11 ± 15   | 20 ± 18   | 26 ± 21   | 14 ± 18   | 22 ± 21   | 21 ± 18   |

CEL, Nε-[1-carboxyethyl]lysine; CML, Nε-[carboxymethyl]lysine; MG-H1, Nδ-[5-hydro-5-methyl-4-imidazolone-2-yl]-ornithine.

<sup>1</sup> Residuals were computed with a linear regression of the ln-transformed intake of AGEs on total energy intake and center.

All values are mean ± SD.

**Supplementary Table 2.** Hazard ratios (95% confidence intervals) for hepatocellular cancer according to tertiles of dietary intake of advanced glycation endproducts (AGEs)<sup>1</sup> in the European Prospective Investigation into Cancer and nutrition, 1992-2000 (n=450,111).

|                      | Residuals of AGEs, tertiles |                    |                    | P <sub>trend</sub> |
|----------------------|-----------------------------|--------------------|--------------------|--------------------|
|                      | T1                          | T2                 | T3                 |                    |
| <b>CML</b>           |                             |                    |                    |                    |
| Cases, n             | 109                         | 70                 | 76                 |                    |
| Model 1 <sup>2</sup> | 1 (Reference)               | 0.68 (0.50 - 0.92) | 0.71 (0.53 - 0.96) | 0.025              |
| Model 2 <sup>3</sup> | 1 (Reference)               | 0.85 (0.62 - 1.17) | 0.88 (0.63 - 1.21) | 0.428              |
| <b>CEL</b>           |                             |                    |                    |                    |
| Cases, n             | 101                         | 87                 | 67                 |                    |
| Model 1 <sup>2</sup> | 1 (Reference)               | 0.79 (0.59 - 1.06) | 0.64 (0.47 - 0.87) | 0.005              |
| Model 2 <sup>3</sup> | 1 (Reference)               | 0.95 (0.70 - 1.29) | 0.75 (0.54 - 1.04) | 0.085              |
| <b>MG-H1</b>         |                             |                    |                    |                    |
| Cases, n             | 121                         | 68                 | 66                 |                    |
| Model 1 <sup>2</sup> | 1 (Reference)               | 0.60 (0.44 - 0.81) | 0.54 (0.40 - 0.73) | <0.001             |
| Model 2 <sup>3</sup> | 1 (Reference)               | 0.77 (0.56 - 1.07) | 0.73 (0.52 - 1.02) | 0.068              |

CEL, Nε-[1-carboxyethyl]lysine; CML, Nε-[carboxymethyl]lysine; MG-H1, Nδ-[5-hydro-5-methyl-4-imidazolone-2-yl]-ornithine. T, tertiles.

<sup>1</sup> Residuals were computed with a linear regression of the ln-transformed intake of AGEs on total energy intake and center.

<sup>2</sup> Model 1: Energy-adjusted and stratified by sex, center, and age at recruitment in 1-year categories.

<sup>3</sup> Model 2: Model 1 and additionally adjusted for educational level, body mass index, physical activity, smoking intensity, lifetime and baseline alcohol intake, coffee intake, self-reported diabetes, and fiber intake.

**Supplementary Table 3.** Hazard ratios (95% confidence intervals) for hepatobiliary cancer subsites according to tertiles of dietary CML intake<sup>1</sup>, European Prospective Investigation into Cancer and nutrition, 1992-2000 (n=450,111).

|                        | Residuals of AGEs, tertiles |                    |                    | P <sub>trend</sub> |
|------------------------|-----------------------------|--------------------|--------------------|--------------------|
|                        | T1                          | T2                 | T3                 |                    |
| <b>CML</b>             |                             |                    |                    |                    |
| Intrahepatic bile duct | n=36                        | n=26               | n=26               |                    |
| Model 1                | 1 (Reference)               | 0.81 (0.49 - 1.35) | 0.78 (0.46 - 1.29) | 0.330              |
| Model 2                | 1 (Reference)               | 0.86 (0.51 - 1.45) | 0.83 (0.49 - 1.42) | 0.503              |
| Extrahepatic bile duct | n=28                        | n=30               | n=27               |                    |
| Model 1                | 1 (Reference)               | 1.05 (0.62 - 1.77) | 0.96 (0.56 - 1.63) | 0.868              |
| Model 2                | 1 (Reference)               | 1.09 (0.64 - 1.86) | 1.01 (0.57 - 1.77) | 0.984              |
| Gallbladder            | n=28                        | n=27               | n=45               |                    |
| Model 1                | 1 (Reference)               | 0.96 (0.56 - 1.63) | 1.49 (0.92 - 2.40) | 0.103              |
| Model 2                | 1 (Reference)               | 0.92 (0.54 - 1.59) | 1.44 (0.88 - 2.36) | 0.146              |

CML, Nε-[carboxymethyl]lysine. T, tertiles.

<sup>1</sup> Residuals were computed with a linear regression of the ln-transformed intake of AGEs on total energy intake and center.

<sup>2</sup> Model 1: Energy-adjusted and stratified by sex, center, and age at recruitment in 1-year categories.

<sup>3</sup> Model 2: Model 1 and additionally adjusted for educational level, body mass index, physical activity, smoking intensity, lifetime and baseline alcohol intake, coffee intake, self-reported diabetes, and fiber intake.

**Supplementary Table 4.** Hazard ratios (95% confidence intervals) for hepatobiliary cancer subsites according to tertiles of dietary CEL intake<sup>1</sup>, European Prospective Investigation into Cancer and nutrition, 1992-2000 (n=450,111).

|                        | Residuals of AGEs, tertiles |                    |                    | P <sub>trend</sub> |
|------------------------|-----------------------------|--------------------|--------------------|--------------------|
|                        | T1                          | T2                 | T3                 |                    |
| <b>CEL</b>             |                             |                    |                    |                    |
| Intrahepatic bile duct | n=30                        | n=32               | n=26               |                    |
| Model 1                | 1 (Reference)               | 1.04 (0.63 - 1.72) | 0.85 (0.50 - 1.44) | 0.536              |
| Model 2                | 1 (Reference)               | 1.08 (0.65 - 1.81) | 0.92 (0.53 - 1.58) | 0.757              |
| Extrahepatic bile duct | n=23                        | n=32               | n=30               |                    |
| Model 1                | 1 (Reference)               | 1.27 (0.74 - 2.20) | 1.24 (0.71 - 2.15) | 0.447              |
| Model 2                | 1 (Reference)               | 1.26 (0.72 - 2.20) | 1.27 (0.72 - 2.24) | 0.414              |
| Gallbladder            | n=29                        | n=27               | n=44               |                    |
| Model 1                | 1 (Reference)               | 0.99 (0.58 - 1.68) | 1.52 (0.95 - 2.44) | 0.084              |
| Model 2                | 1 (Reference)               | 0.96 (0.56 - 1.63) | 1.43 (0.88 - 2.31) | 0.150              |

CEL, N $\epsilon$ -[1-carboxyethyl]lysine; T, tertiles.

<sup>1</sup> Residuals were computed with a linear regression of the ln-transformed intake of AGEs on total energy intake and center.

<sup>2</sup> Model 1: Energy-adjusted and stratified by sex, center, and age at recruitment in 1-year categories.

<sup>3</sup> Model 2: Model 1 and additionally adjusted for educational level, body mass index, physical activity, smoking intensity, lifetime and baseline alcohol intake, coffee intake, self-reported diabetes, and fiber intake.

**Supplementary Table 5.** Hazard ratios (95% confidence intervals) for hepatobiliary cancer subsites according to tertiles of dietary MG-H1 intake<sup>1</sup>, European Prospective Investigation into Cancer and nutrition, 1992-2000 (n=450,111).

|                        | Residuals of AGEs, tertiles |                    |                    | P <sub>trend</sub> |
|------------------------|-----------------------------|--------------------|--------------------|--------------------|
|                        | T1                          | T2                 | T3                 |                    |
| <b>MG-H1</b>           |                             |                    |                    |                    |
| Intrahepatic bile duct | n=35                        | n=23               | n=30               |                    |
| Model 1                | 1 (Reference)               | 0.70 (0.41 - 1.19) | 0.88 (0.54 - 1.44) | 0.618              |
| Model 2                | 1 (Reference)               | 0.78 (0.45 - 1.36) | 1.08 (0.63 - 1.84) | 0.785              |
| Extrahepatic bile duct | n=29                        | n=26               | n=30               |                    |
| Model 1                | 1 (Reference)               | 0.86 (0.50 - 1.47) | 0.97 (0.58 - 1.62) | 0.901              |
| Model 2                | 1 (Reference)               | 0.94 (0.53 - 1.64) | 1.15 (0.65 - 2.04) | 0.638              |
| Gallbladder            | n=25                        | n=29               | n=46               |                    |
| Model 1                | 1 (Reference)               | 1.21 (0.70 - 2.07) | 1.73 (1.06 - 2.84) | 0.029              |
| Model 2                | 1 (Reference)               | 1.22 (0.70 - 2.13) | 1.81 (1.07 - 3.06) | 0.028              |

MG-H1, N $\delta$ -[5-hydro-5-methyl-4-imidazolone-2-yl]-ornithine. T, tertiles.

<sup>1</sup> Residuals were computed with a linear regression of the ln-transformed intake of AGEs on total energy intake and center.

<sup>2</sup> Model 1: Energy-adjusted and stratified by sex, center, and age at recruitment in 1-year categories.

<sup>3</sup> Model 2: Model 1 and additionally adjusted for educational level, body mass index, physical activity, smoking intensity, lifetime and baseline alcohol intake, coffee intake, self-reported diabetes, and fiber intake.

**Supplementary Table 6.** Sensitivity analyses showing hazard ratios (95% confidence intervals) for hepatocellular carcinoma according to dietary intake of advanced glycation endproducts (AGEs)<sup>1</sup> in the European Prospective Investigation into Cancer and nutrition, 1992-2000 (n=450,111).

|            | N (%)                 | Tertile (T)1  | T2                 | T3                 | P <sub>trend</sub> | AGEs intake per 1 SD increments | P <sub>value</sub> |
|------------|-----------------------|---------------|--------------------|--------------------|--------------------|---------------------------------|--------------------|
| <b>CML</b> |                       |               |                    |                    |                    |                                 |                    |
| Model 2    | 450,111 (100)         | 1 (Reference) | 0.85 (0.62 - 1.17) | 0.88 (0.63 - 1.21) | 0.428              | 0.87 (0.76 - 0.99)              | 0.030              |
| Model S1   | 442,536 (98)          | 1 (Reference) | 0.85 (0.61 - 1.19) | 0.91 (0.65 - 1.28) | 0.590              | 0.95 (0.80 - 1.13)              | 0.572              |
| Model S2   | 450,111 (100)         | 1 (Reference) | 0.83 (0.60 - 1.13) | 0.82 (0.60 - 1.14) | 0.242              | 0.85 (0.74 - 0.96)              | 0.012              |
| Model S3   | 309,258 (69)          | 1 (Reference) | 0.82 (0.55 - 1.25) | 0.72 (0.48 - 1.10) | 0.129              | 0.84 (0.71 - 0.99)              | 0.038              |
| Model S4   | 407,434 (91)          | 1 (Reference) | 0.83 (0.58 - 1.18) | 0.86 (0.61 - 1.22) | 0.413              | 0.90 (0.78 - 1.05)              | 0.176              |
| Model S5   | 450,111 (100)         | 1 (Reference) | 0.84 (0.61 - 1.16) | 0.86 (0.62 - 1.18) | 0.346              | 0.92 (0.78 - 1.09)              | 0.335              |
| Model S6   | 301,987 (67)          | 1 (Reference) | 0.83 (0.57 - 1.23) | 0.79 (0.53 - 1.18) | 0.252              | 0.84 (0.71 - 0.99)              | 0.036              |
| Model S7   | 407 (79) <sup>2</sup> | 1 (Reference) | 0.66 (0.36 - 1.21) | 0.77 (0.42 - 1.42) | 0.400              | 0.83 (0.63 - 1.10)              | 0.190              |
| Model S8   | 324 (53) <sup>2</sup> | 1 (Reference) | 0.89 (0.44 - 1.81) | 0.90 (0.45 - 1.80) | 0.764              | 0.88 (0.64 - 1.22)              | 0.449              |
| Model S9   | 407 (79) <sup>2</sup> | 1 (Reference) | 0.68 (0.39 - 1.20) | 0.75 (0.42 - 1.31) | 0.310              | 0.80 (0.62 - 1.04)              | 0.094              |
| Model S10  | 450,111 (100)         | 1 (Reference) | 0.87 (0.63 - 1.20) | 0.92 (0.66 - 1.28) | 0.612              | 0.88 (0.77 - 1.00)              | 0.055              |
| Model S11  | 450,111 (100)         | 1 (Reference) | 0.86 (0.63 - 1.19) | 0.90 (0.65 - 1.24) | 0.506              | 0.87 (0.77 - 1.00)              | 0.046              |
| Model S12  | 450,111 (100)         | 1 (Reference) | 0.87 (0.63 - 1.19) | 0.92 (0.66 - 1.27) | 0.600              | 0.88 (0.77 - 1.01)              | 0.061              |

**CEL**

|              |                       |               |                    |                    |       |                    |       |
|--------------|-----------------------|---------------|--------------------|--------------------|-------|--------------------|-------|
| Model 2      | 450,111 (100)         | 1 (Reference) | 0.95 (0.70 - 1.29) | 0.75 (0.54 - 1.04) | 0.085 | 0.84 (0.74 - 0.96) | 0.008 |
| Model S1     | 442,536 (98)          | 1 (Reference) | 0.96 (0.70 - 1.31) | 0.74 (0.52 - 1.04) | 0.083 | 0.86 (0.73 - 1.02) | 0.088 |
| Model S2     | 450,111 (100)         | 1 (Reference) | 0.93 (0.69 - 1.26) | 0.72 (0.52 - 1.00) | 0.051 | 0.83 (0.73 - 0.94) | 0.005 |
| Model S3     | 309,258 (69)          | 1 (Reference) | 0.95 (0.64 - 1.41) | 0.64 (0.41 - 0.98) | 0.042 | 0.85 (0.72 - 1.00) | 0.056 |
| Model S4     | 407,434 (91)          | 1 (Reference) | 1.01 (0.72 - 1.42) | 0.79 (0.55 - 1.14) | 0.216 | 0.85 (0.73 - 0.98) | 0.028 |
| Model S5     | 450,111 (100)         | 1 (Reference) | 0.94 (0.69 - 1.27) | 0.73 (0.53 - 1.02) | 0.067 | 0.86 (0.73 - 1.01) | 0.070 |
| Model S6     | 301,987 (67)          | 1 (Reference) | 1.02 (0.71 - 1.46) | 0.63 (0.42 - 0.96) | 0.032 | 0.79 (0.67 - 0.93) | 0.006 |
| Model S7     | 407 (79) <sup>2</sup> | 1 (Reference) | 1.01 (0.56 - 1.81) | 0.61 (0.33 - 1.15) | 0.128 | 0.70 (0.53 - 0.92) | 0.012 |
| Model S8     | 324 (53) <sup>2</sup> | 1 (Reference) | 1.08 (0.55 - 2.12) | 0.82 (0.41 - 1.65) | 0.575 | 0.74 (0.54 - 1.01) | 0.055 |
| Model S9     | 407 (79) <sup>2</sup> | 1 (Reference) | 1.07 (0.62 - 1.84) | 0.60 (0.34 - 1.06) | 0.078 | 0.68 (0.53 - 0.88) | 0.003 |
| Model S10    | 450,111 (100)         | 1 (Reference) | 0.97 (0.71 - 1.32) | 0.77 (0.55 - 1.07) | 0.118 | 0.85 (0.74 - 0.97) | 0.013 |
| Model S11    | 450,111 (100)         | 1 (Reference) | 0.97 (0.71 - 1.33) | 0.78 (0.55 - 1.10) | 0.162 | 0.84 (0.73 - 0.97) | 0.019 |
| Model S12    | 450,111 (100)         | 1 (Reference) | 0.96 (0.71 - 1.30) | 0.76 (0.54 - 1.06) | 0.102 | 0.84 (0.74 - 0.96) | 0.011 |
| <b>MG-H1</b> |                       |               |                    |                    |       |                    |       |
| Model 2      | 450,111 (100)         | 1 (Reference) | 0.77 (0.56 - 1.07) | 0.73 (0.52 - 1.02) | 0.068 | 0.84 (0.74 - 0.97) | 0.015 |
| Model S1     | 442,536 (98)          | 1 (Reference) | 0.79 (0.56 - 1.10) | 0.73 (0.51 - 1.04) | 0.082 | 0.85 (0.71 - 1.02) | 0.075 |
| Model S2     | 450,111 (100)         | 1 (Reference) | 0.77 (0.56 - 1.06) | 0.71 (0.51 - 0.99) | 0.046 | 0.85 (0.74 - 0.96) |       |



0.012

|           |                       |               |                    |                    |       |                    |       |
|-----------|-----------------------|---------------|--------------------|--------------------|-------|--------------------|-------|
| Model S3  | 309,258 (69)          | 1 (Reference) | 0.68 (0.45 - 1.04) | 0.65 (0.42 - 1.00) | 0.050 | 0.83 (0.70 - 0.99) | 0.033 |
| Model S4  | 407,434 (91)          | 1 (Reference) | 0.78 (0.54 - 1.11) | 0.72 (0.50 - 1.05) | 0.084 | 0.85 (0.74 - 0.99) | 0.040 |
| Model S5  | 450,111 (100)         | 1 (Reference) | 0.76 (0.55 - 1.05) | 0.72 (0.51 - 1.00) | 0.053 | 0.84 (0.71 - 1.00) | 0.048 |
| Model S6  | 301,987 (67)          | 1 (Reference) | 0.69 (0.46 - 1.03) | 0.69 (0.46 - 1.04) | 0.078 | 0.81 (0.68 - 0.97) | 0.021 |
| Model S7  | 407 (79) <sup>2</sup> | 1 (Reference) | 0.76 (0.42 - 1.37) | 0.54 (0.28 - 1.03) | 0.059 | 0.70 (0.52 - 0.94) | 0.016 |
| Model S8  | 324 (53) <sup>2</sup> | 1 (Reference) | 0.72 (0.36 - 1.43) | 0.55 (0.26 - 1.17) | 0.122 | 0.69 (0.49 - 0.97) | 0.034 |
| Model S9  | 407 (79) <sup>2</sup> | 1 (Reference) | 0.66 (0.38 - 1.15) | 0.60 (0.33 - 1.07) | 0.084 | 0.71 (0.54 - 0.92) | 0.010 |
| Model S10 | 450,111 (100)         | 1 (Reference) | 0.79 (0.57 - 1.09) | 0.75 (0.53 - 1.06) | 0.098 | 0.85 (0.74 - 0.98) | 0.025 |
| Model S11 | 450,111 (100)         | 1 (Reference) | 0.77 (0.56 - 1.07) | 0.73 (0.52 - 1.03) | 0.073 | 0.85 (0.74 - 0.97) | 0.019 |
| Model S12 | 450,111 (100)         | 1 (Reference) | 0.79 (0.57 - 1.09) | 0.76 (0.53 - 1.08) | 0.128 | 0.85 (0.74 - 0.99) | 0.037 |

CML, Nε-[carboxymethyl]lysine; CEL, Nε-[1-carboxyethyl]lysine; MG-H1, Nδ-[5-hydro-5-methyl-4-imidazolone-2-yl]-ornithine; NA, not available.

<sup>1</sup> Residuals were computed by a linear regression of the ln-transformed intake of AGEs on total energy intake and center.

<sup>2</sup> Percentage refers to the proportion of cases in the nested case-control dataset (n=202) compared to the number of cases in full cohort (n=255).

Model 2: main model stratified by sex, center and age in 1-year categories, and adjusted for total energy intake, educational level, body mass index, physical activity, smoking intensity, lifetime and baseline alcohol intake, coffee intake, self-reported diabetes, and fiber intake.

Model S1: model 2 after excluding cancer events that occurred during the first two years of follow-up.

Model S2: model 2 adjusted for the Mediterranean dietary score (mrMDS) instead of fiber intake.

Model S3: model 2 after excluding current smokers.

Model S4: model 2 after excluding subjects reporting heavy drinking at any point in lifetime.

Model S5: model 2 with additional adjustment for under- or over-reporting of total energy intake according to Goldberg.

Model S6: model 2 using a complete case analysis.

Model S7: Odds ratio and 95% confidence interval from conditional logistic regression using the nested case-control dataset with n=204 cases and n=205 matched controls, adjusted for matching factors (incl. sex, age, center), and total energy intake, educational level, body mass index, physical activity, smoking status, alcohol at recruitment, coffee intake, self-reported diabetes, fiber intake, and hepatitis B and C infection status.

Model S8: Odds ratio and 95% confidence interval from conditional logistic regression using the nested case-control dataset excluding those with positive hepatitis B and

---

C infection status, adjusted for matching factors (incl. sex, age, center), and total energy intake, educational level, body mass index, physical activity, smoking status, alcohol at recruitment, coffee intake, self-reported diabetes, and fiber intake.

Model S9: Odds ratio and 95% confidence interval from conditional logistic regression using the nested case-control dataset with n=204 cases and n=205 matched controls, adjusted for matching factors (incl. sex, age, center), and total energy intake, educational level, body mass index, physical activity, smoking status, alcohol at recruitment, coffee intake, self-reported diabetes, fiber intake, and liver function status: “1” if any was above the clinical threshold (ALT>55 U l<sup>-1</sup>, AST>34 U l<sup>-1</sup>, GGT men >64 U l<sup>-1</sup>, GGT women>36 U l<sup>-1</sup>, ALP>150 U l<sup>-1</sup>, albumin<34 g l<sup>-1</sup>, total bilirubin>20.5 μmol l<sup>-1</sup>; based on the values provided by the laboratory) vs. “0”.

Model S10: model 2 with additional adjustment for cake & biscuit intake.

Model S11: model 2 with additional adjustment for red meat & processed meat intake.

Model S12: model 2 with additional adjustment for cereal intake.

**Supplementary Table 7.** Sensitivity analyses showing hazard ratios (95% confidence intervals) for gallbladder cancer according to dietary intake of advanced glycation endproducts (AGEs)<sup>1</sup> in the European Prospective Investigation into Cancer and nutrition, 1992-2000 (n=450,111).

|            | N (%)         | Tertile (T)1     | T2                 | T3                 | P <sub>trend</sub> | AGEs intake per 1 SD increments | P <sub>value</sub> |
|------------|---------------|------------------|--------------------|--------------------|--------------------|---------------------------------|--------------------|
| <b>CML</b> |               |                  |                    |                    |                    |                                 |                    |
| Model 2    | 450,111 (100) | 1<br>(Reference) | 0.92 (0.54 - 1.59) | 1.44 (0.88 - 2.36) | 0.146              | 1.28 (1.05 - 1.56)              | 0.014              |
| Model S1   | 442,536 (98)  | 1<br>(Reference) | 0.95 (0.54 - 1.66) | 1.45 (0.87 - 2.42) | 0.156              | 1.23 (0.94 - 1.60)              | 0.130              |
| Model S2   | 450,111 (100) | 1<br>(Reference) | 0.94 (0.55 - 1.61) | 1.46 (0.89 - 2.39) | 0.135              | 1.29 (1.06 - 1.58)              | 0.011              |
| Model S3   | 309,258 (69)  | 1<br>(Reference) | 1.00 (0.52 - 1.89) | 1.58 (0.88 - 2.83) | 0.127              | 1.28 (1.02 - 1.62)              | 0.036              |
| Model S4   | 407,434 (91)  | 1<br>(Reference) | 1.04 (0.59 - 1.82) | 1.51 (0.90 - 2.52) | 0.118              | 1.28 (1.05 - 1.57)              | 0.017              |
| Model S5   | 450,111 (100) | 1<br>(Reference) | 0.98 (0.57 - 1.69) | 1.56 (0.95 - 2.56) | 0.080              | 1.27 (0.99 - 1.64)              | 0.063              |
| Model S6   | 301,987 (67)  | 1<br>(Reference) | 1.01 (0.50 - 2.04) | 1.56 (0.81 - 3.01) | 0.185              | 1.28 (0.98 - 1.68)              | 0.075              |
| Model S7   | 450,111 (100) | 1<br>(Reference) | 0.91 (0.53 - 1.56) | 1.38 (0.83 - 2.29) | 0.213              | 1.27 (1.03 - 1.55)              | 0.023              |
| Model S8   | 450,111 (100) | 1<br>(Reference) | 0.96 (0.56 - 1.66) | 1.51 (0.92 - 2.49) | 0.101              | 1.31 (1.07 - 1.59)              | 0.008              |
| Model S9   | 450,111 (100) | 1<br>(Reference) | 0.90 (0.52 - 1.55) | 1.34 (0.81 - 2.21) | 0.261              | 1.23 (1.00 - 1.53)              | 0.055              |
| <b>CEL</b> |               |                  |                    |                    |                    |                                 |                    |
| Model 2    | 450,111 (100) | 1<br>(Reference) | 0.96 (0.56 - 1.63) | 1.43 (0.88 - 2.31) | 0.150              | 1.17 (0.96 - 1.41)              | 0.114              |

|              |               |                  |                    |                    |       |                    |       |
|--------------|---------------|------------------|--------------------|--------------------|-------|--------------------|-------|
| Model S1     | 442,536 (98)  | 1<br>(Reference) | 0.96 (0.55 - 1.66) | 1.42 (0.86 - 2.35) | 0.167 | 1.21 (0.94 - 1.56) | 0.146 |
| Model S2     | 450,111 (100) | 1<br>(Reference) | 0.96 (0.56 - 1.64) | 1.44 (0.89 - 2.34) | 0.133 | 1.17 (0.97 - 1.42) | 0.099 |
| Model S3     | 309,258 (69)  | 1<br>(Reference) | 0.86 (0.46 - 1.59) | 1.34 (0.77 - 2.32) | 0.298 | 1.15 (0.92 - 1.44) | 0.205 |
| Model S4     | 407,434 (91)  | 1<br>(Reference) | 1.01 (0.58 - 1.77) | 1.55 (0.94 - 2.56) | 0.088 | 1.20 (0.99 - 1.46) | 0.065 |
| Model S5     | 450,111 (100) | 1<br>(Reference) | 1.01 (0.59 - 1.72) | 1.53 (0.94 - 2.48) | 0.087 | 1.25 (0.98 - 1.60) | 0.074 |
| Model S6     | 301,987 (67)  | 1<br>(Reference) | 1.14 (0.59 - 2.19) | 1.13 (0.59 - 2.16) | 0.707 | 1.09 (0.84 - 1.42) | 0.518 |
| Model S7     | 450,111 (100) | 1<br>(Reference) | 0.94 (0.55 - 1.60) | 1.38 (0.85 - 2.25) | 0.193 | 1.15 (0.95 - 1.40) | 0.143 |
| Model S8     | 450,111 (100) | 1<br>(Reference) | 1.05 (0.61 - 1.80) | 1.67 (1.01 - 2.77) | 0.046 | 1.26 (1.03 - 1.54) | 0.024 |
| Model S9     | 450,111 (100) | 1<br>(Reference) | 0.94 (0.55 - 1.61) | 1.37 (0.85 - 2.24) | 0.200 | 1.14 (0.94 - 1.38) | 0.184 |
| <b>MG-H1</b> |               |                  |                    |                    |       |                    |       |
| Model 2      | 450,111 (100) | 1<br>(Reference) | 1.22 (0.70 - 2.13) | 1.81 (1.07 - 3.06) | 0.028 | 1.27 (1.06 - 1.54) | 0.011 |
| Model S1     | 442,536 (98)  | 1<br>(Reference) | 1.23 (0.69 - 2.18) | 1.78 (1.03 - 3.08) | 0.040 | 1.34 (1.02 - 1.77) | 0.034 |
| Model S2     | 450,111 (100) | 1<br>(Reference) | 1.22 (0.71 - 2.12) | 1.83 (1.10 - 3.06) | 0.020 | 1.28 (1.07 - 1.54) | 0.007 |
| Model S3     | 309,258 (69)  | 1<br>(Reference) | 1.00 (0.53 - 1.90) | 1.55 (0.85 - 2.83) | 0.149 | 1.25 (1.01 - 1.56) | 0.044 |
| Model S4     | 407,434 (91)  | 1<br>(Reference) | 1.36 (0.76 - 2.43) | 1.91 (1.10 - 3.33) | 0.022 | 1.28 (1.06 - 1.55) | 0.012 |
| Model S5     | 450,111 (100) | 1<br>(Reference) | 1.28 (0.74 - 2.23) | 1.91 (1.13 - 3.24) | 0.016 | 1.39 (1.07 - 1.81) | 0.013 |

|          |               |                  |                    |                    |       |                    |       |
|----------|---------------|------------------|--------------------|--------------------|-------|--------------------|-------|
| Model S6 | 301,987 (67)  | 1<br>(Reference) | 1.20 (0.61 - 2.34) | 1.40 (0.71 - 2.77) | 0.330 | 1.19 (0.91 - 1.56) | 0.192 |
| Model S7 | 450,111 (100) | 1<br>(Reference) | 1.20 (0.69 - 2.09) | 1.75 (1.02 - 2.98) | 0.040 | 1.26 (1.04 - 1.53) | 0.016 |
| Model S8 | 450,111 (100) | 1<br>(Reference) | 1.23 (0.71 - 2.14) | 1.82 (1.08 - 3.09) | 0.025 | 1.28 (1.06 - 1.55) | 0.009 |
| Model S9 | 450,111 (100) | 1<br>(Reference) | 1.18 (0.68 - 2.05) | 1.66 (0.96 - 2.87) | 0.070 | 1.23 (1.00 - 1.52) | 0.051 |

CML, Nε-[carboxymethyl]lysine; CEL, Nε-[1-carboxyethyl]lysine; MG-H1, Nδ-[5-hydro-5-methyl-4-imidazolone-2-yl]-ornithine.

<sup>1</sup> Residuals were computed with a linear regression of the ln-transformed intake of AGEs on total energy intake and center.

Model 2: main model stratified by sex, center and age in 1-year categories, and adjusted for total energy intake, educational level, body mass index, physical activity, smoking intensity, lifetime and baseline alcohol intake, coffee intake, self-reported diabetes, and fiber intake.

Model S1: model 2 after excluding cancer events that occurred during the first two years of follow-up.

Model S2: model 2 adjusted for the Mediterranean dietary score (mrMDS) instead of fiber intake.

Model S3: model 2 after excluding current smokers.

Model S4: model 2 after excluding subjects reporting heavy drinking at any point in lifetime.

Model S5: model 2 with additional adjustment for under- or over-reporting of total energy intake according to Goldberg.

Model S6: model 2 using a complete case analysis.

Model S7: model 2 with additional adjustment for cake & biscuit intake.

Model S8: model 2 with additional adjustment for red meat & processed meat intake.

Model S9: model 2 with additional adjustment for cereal intake.

**Supplementary Figure 1.** Flowchart for participant inclusion criteria.

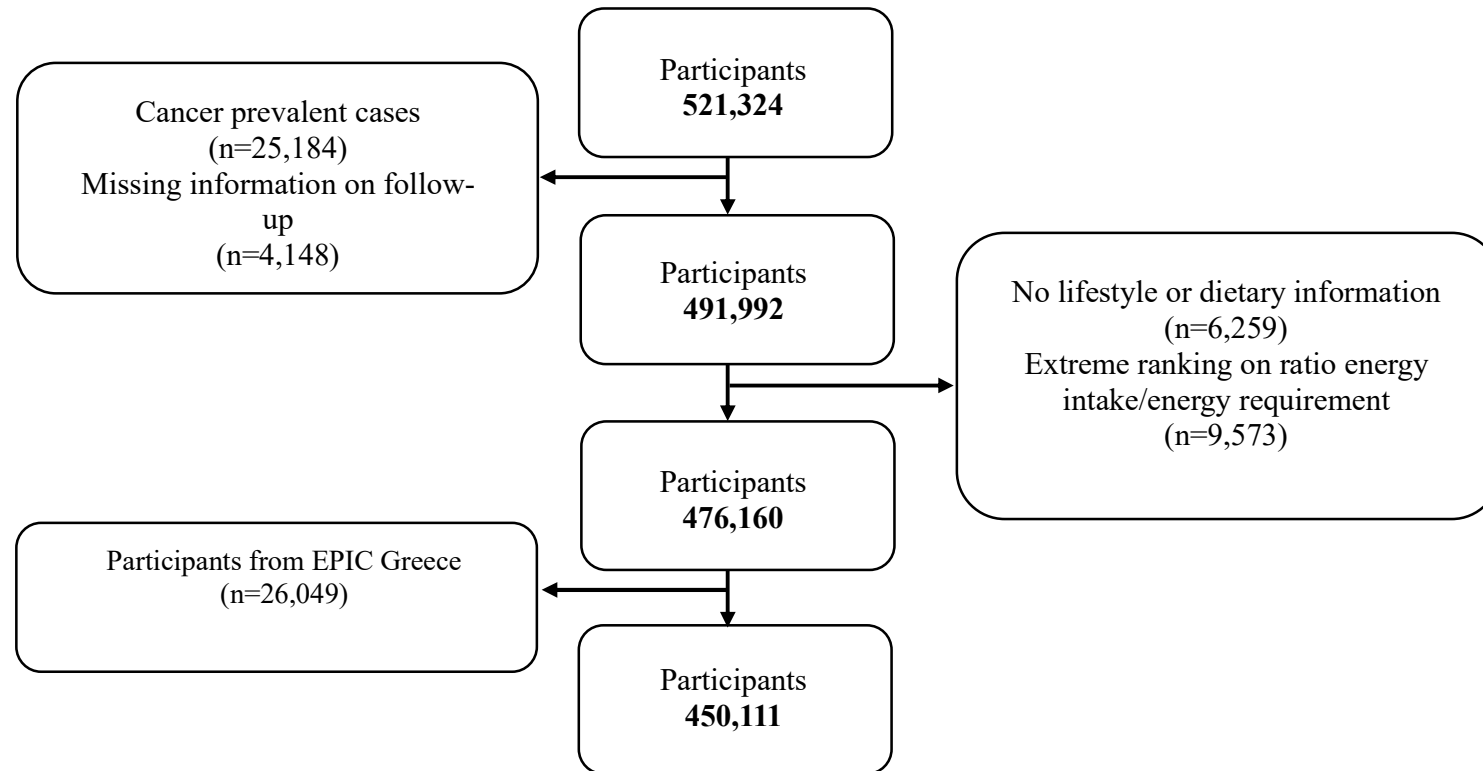

**Supplementary Figure 2.** Food group sources of dietary intake of advanced glycation endproducts in the European Prospective Investigation into Cancer and nutrition (EPIC).

CML, N $\epsilon$ -[carboxymethyl]lysine; CEL, N $\epsilon$ -[1-carboxyethyl]lysine; MG-H1, N $\delta$ -[5-hydro-5-methyl-4-imidazol-2-yl]-ornithine.

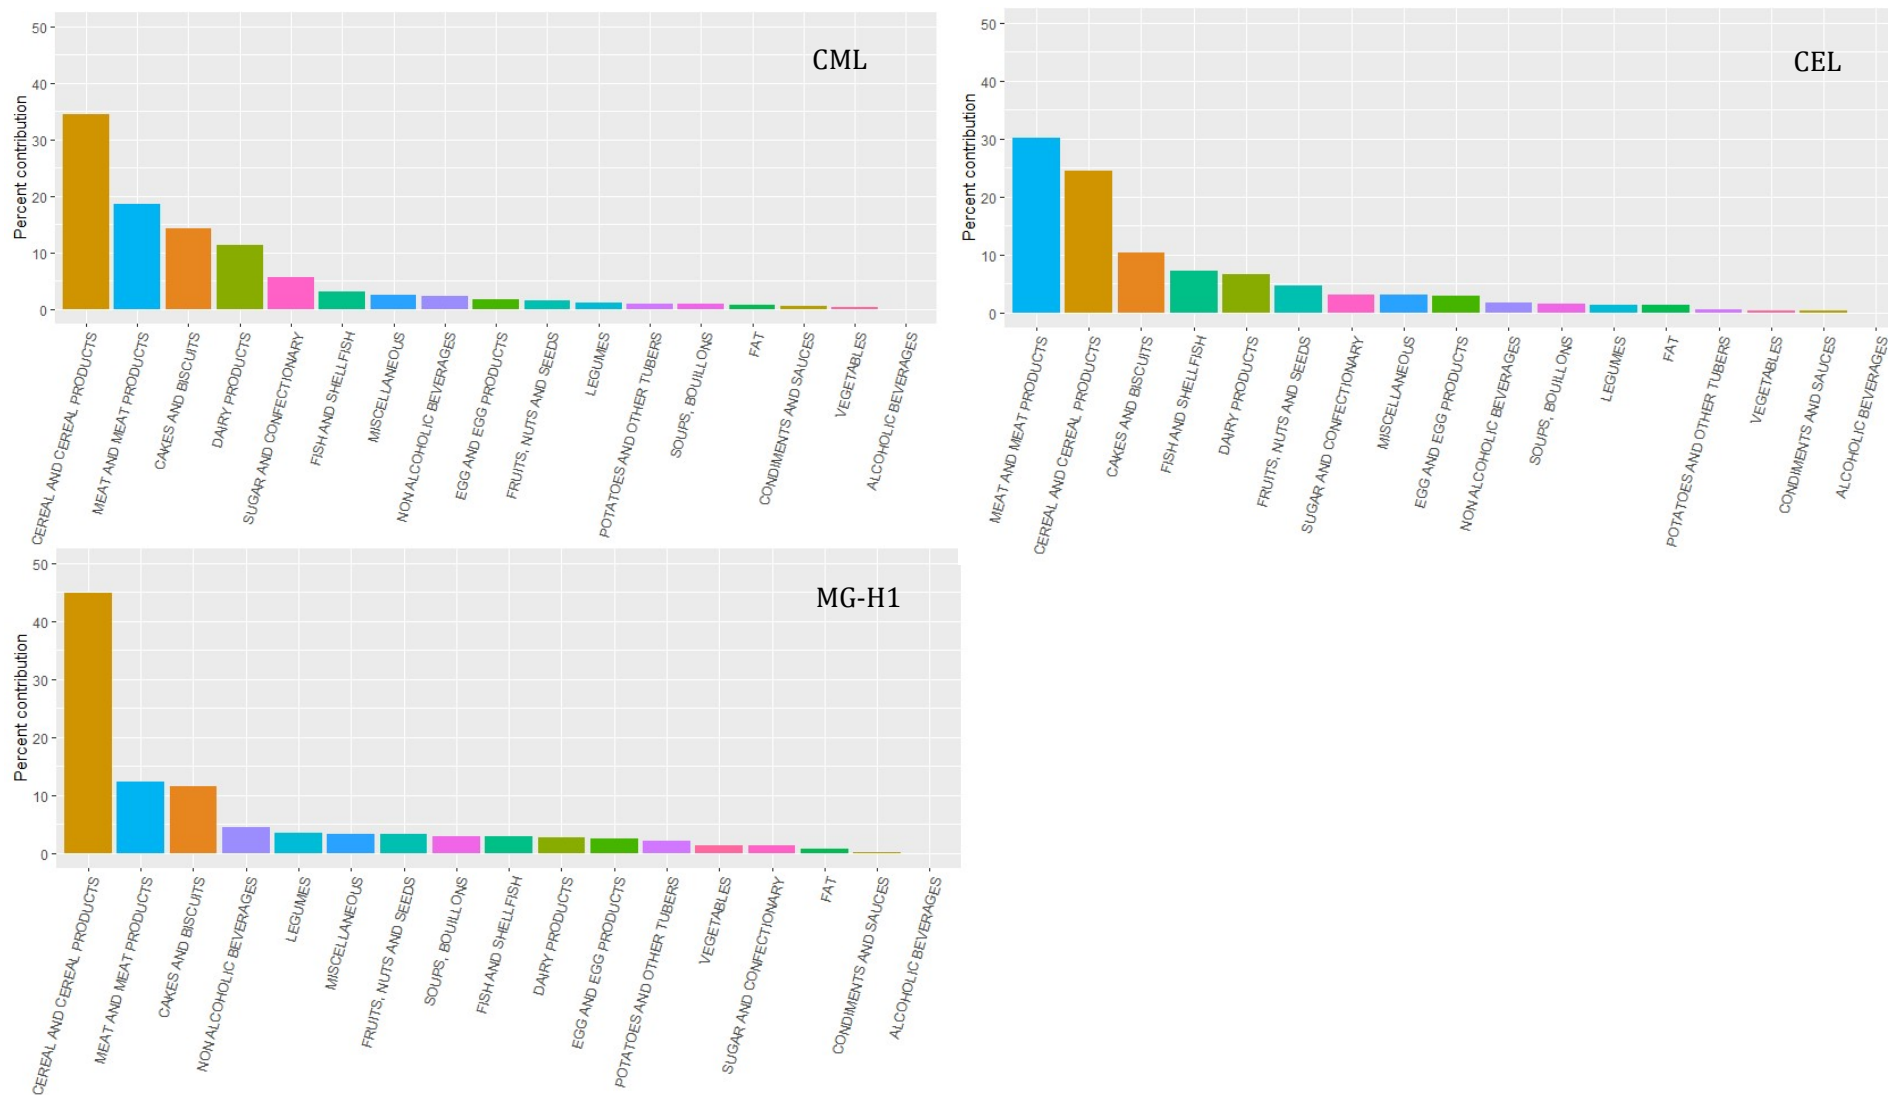

**Supplementary Figure 3.** Percentage contribution of food groups to CML, CEL and MG-H1 intake in the European Prospective Investigation into Cancer and nutrition (EPIC), by geographical region (North: Sweden, Denmark, and Norway; Central: France, the United Kingdom, the Netherlands, and Germany; South: Italy and Spain).

CML, N $\epsilon$ -[carboxymethyl]lysine; CEL, N $\epsilon$ -[1-carboxyethyl]lysine; MG-H1, N $\delta$ -[5-hydro-5-methyl-4-imidazolone-2-yl]-ornithine.

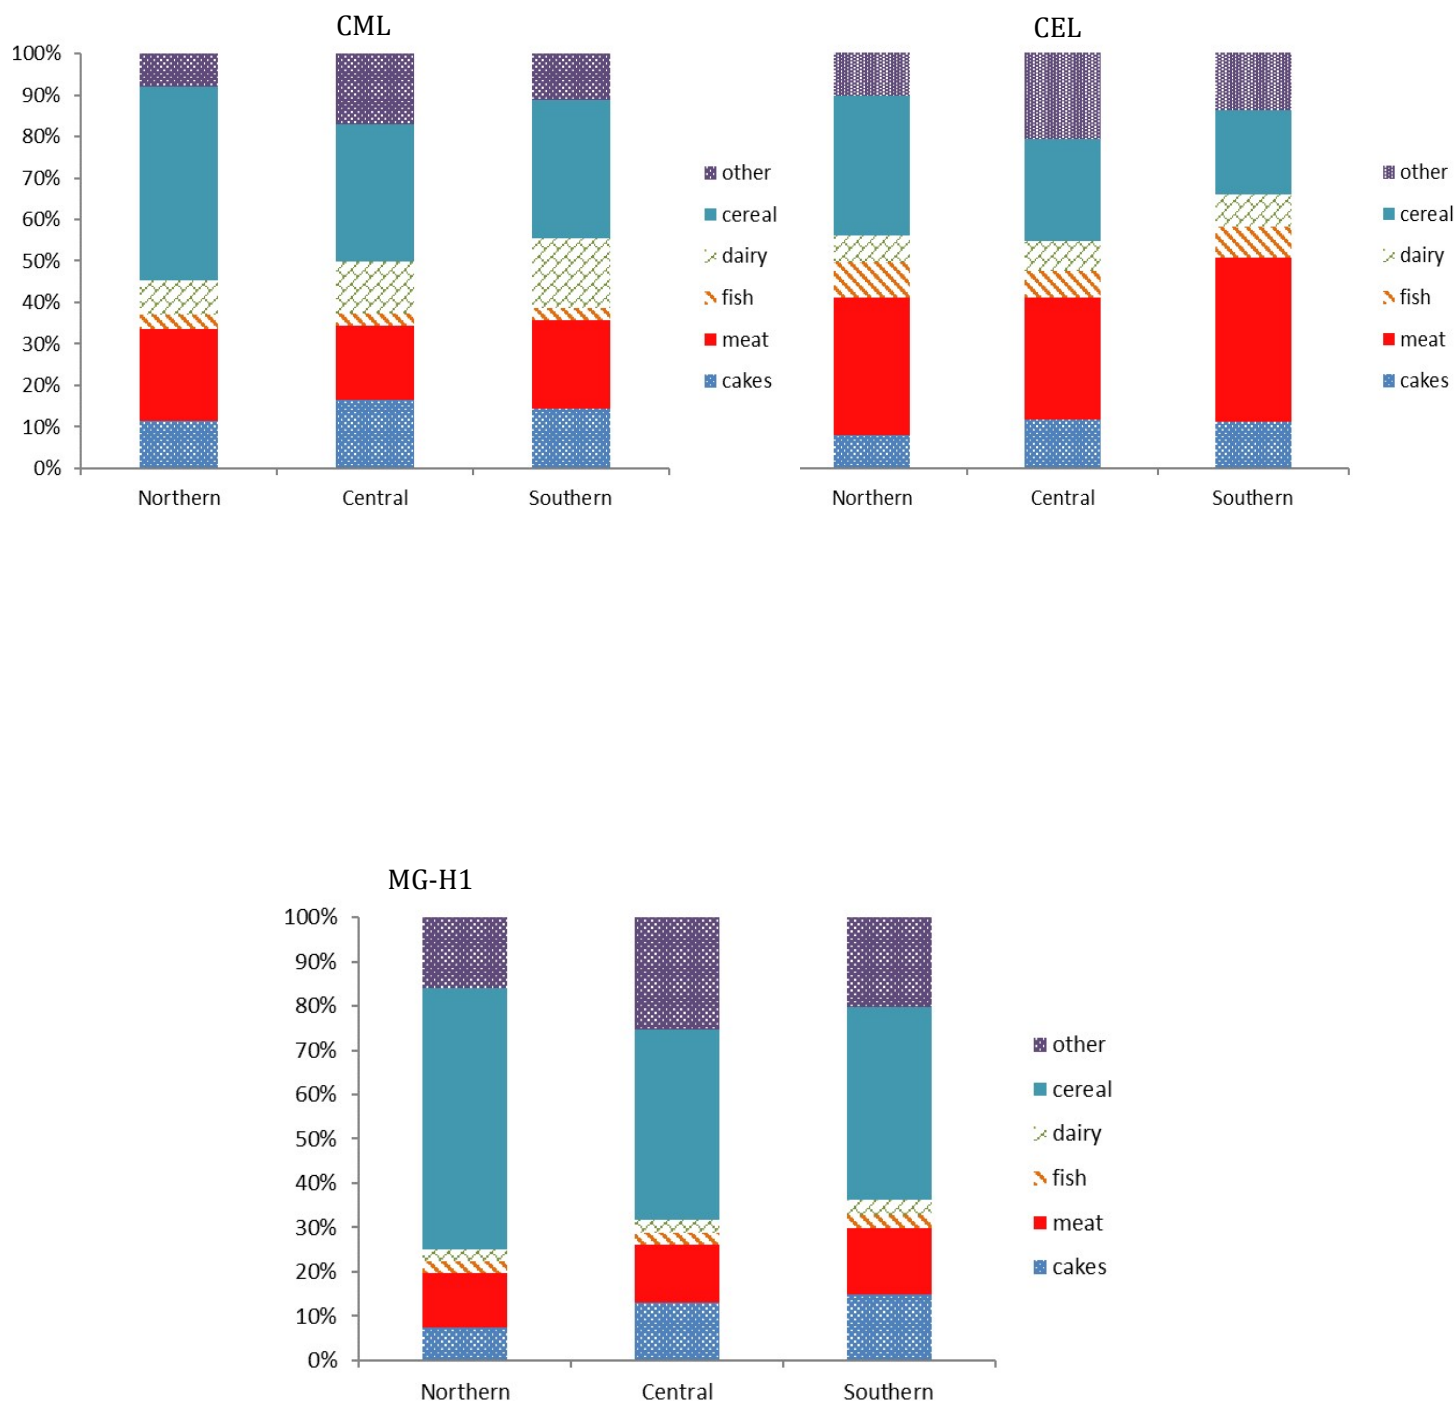



**Supplementary Figure 4.** Subgroup analysis showing hazard ratios (HR) and 95% confidence intervals (CI) for hepatocellular carcinoma according to dietary intake of advanced glycation endproducts (AGEs)<sup>1</sup> in the European Prospective Investigation into Cancer and nutrition, 1992-2000 (n=450,111).

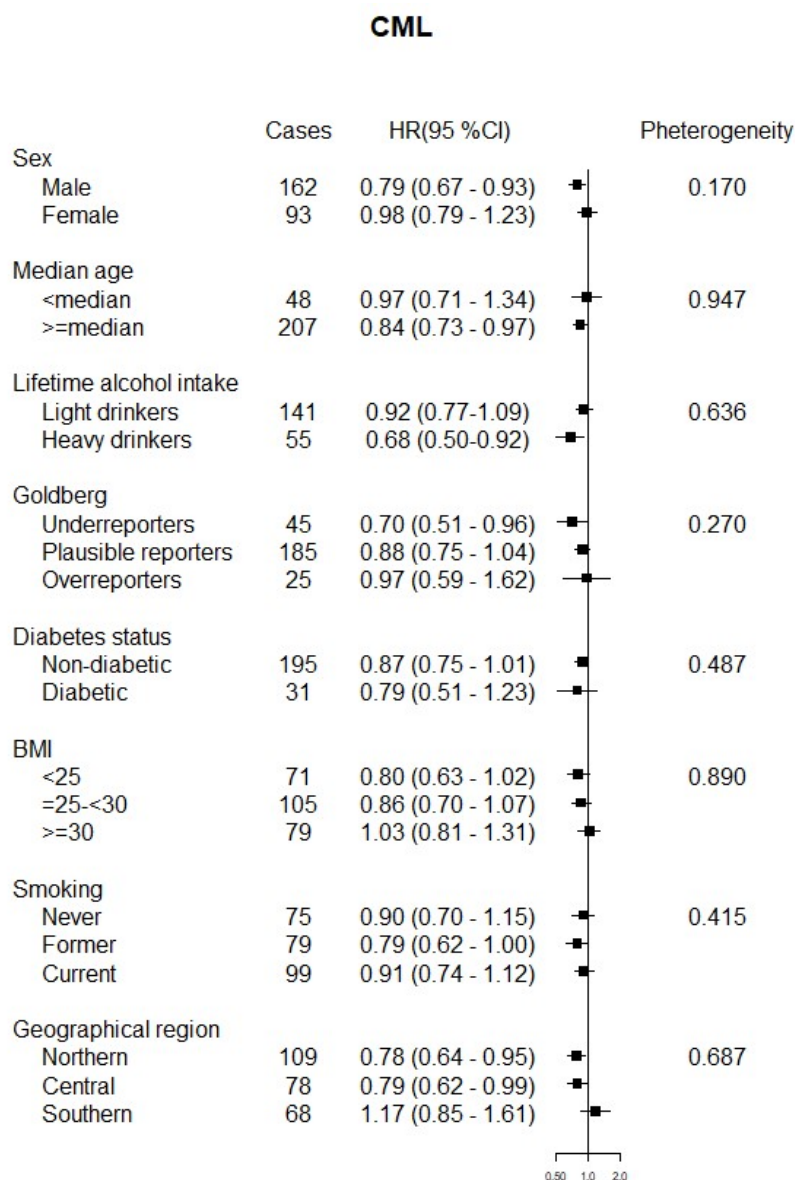

CML, N $\epsilon$ -[carboxymethyl]lysine.

<sup>1</sup> Residuals were computed with a linear regression of the ln-transformed intake of AGEs on total energy intake and center.

Geographical region (North: Sweden, Denmark, and Norway; Central: France, the United Kingdom, the Netherlands, and Germany; South: Italy and Spain).

Model 2: main model stratified by sex, center and age in 1-year categories, and adjusted for total energy intake, educational level, body mass index, physical activity, smoking intensity, lifetime and baseline alcohol intake, coffee intake, self-reported diabetes, and fiber intake.

**Supplementary Figure 5.** Subgroup analysis showing hazard ratios (HR) and 95% confidence intervals (CI) for hepatocellular carcinoma according to dietary intake of advanced glycation endproducts (AGEs)<sup>1</sup> in the European Prospective Investigation into Cancer and nutrition, 1992-2000 (n=450,111).

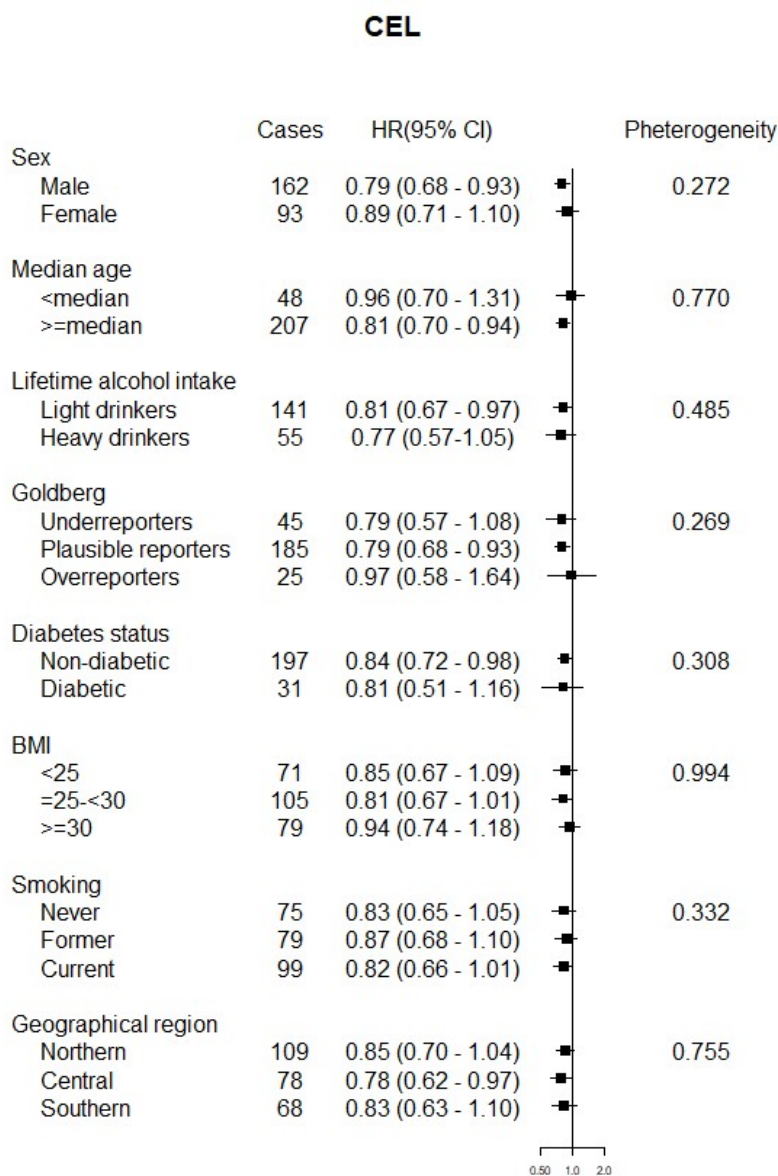

CEL, Nε-[1-carboxyethyl]lysine.

<sup>1</sup> Residuals were computed with a linear regression of the ln-transformed intake of AGEs on total energy intake and center.

Geographical region (North: Sweden, Denmark, and Norway; Central: France, the United Kingdom, the Netherlands, and Germany; South: Italy and Spain).

Model 2: main model stratified by sex, center and age in 1-year categories, and adjusted for total energy intake, educational level, body mass index, physical activity, smoking intensity, lifetime and baseline alcohol intake, coffee intake, self-reported diabetes, and fiber intake.

**Supplementary Figure 6.** Subgroup analysis showing hazard ratios (HR) and 95% confidence intervals (CI) for hepatocellular carcinoma according to dietary intake of advanced glycation endproducts (AGEs)<sup>1</sup> in the European Prospective Investigation into Cancer and nutrition, 1992-2000 (n=450,111).

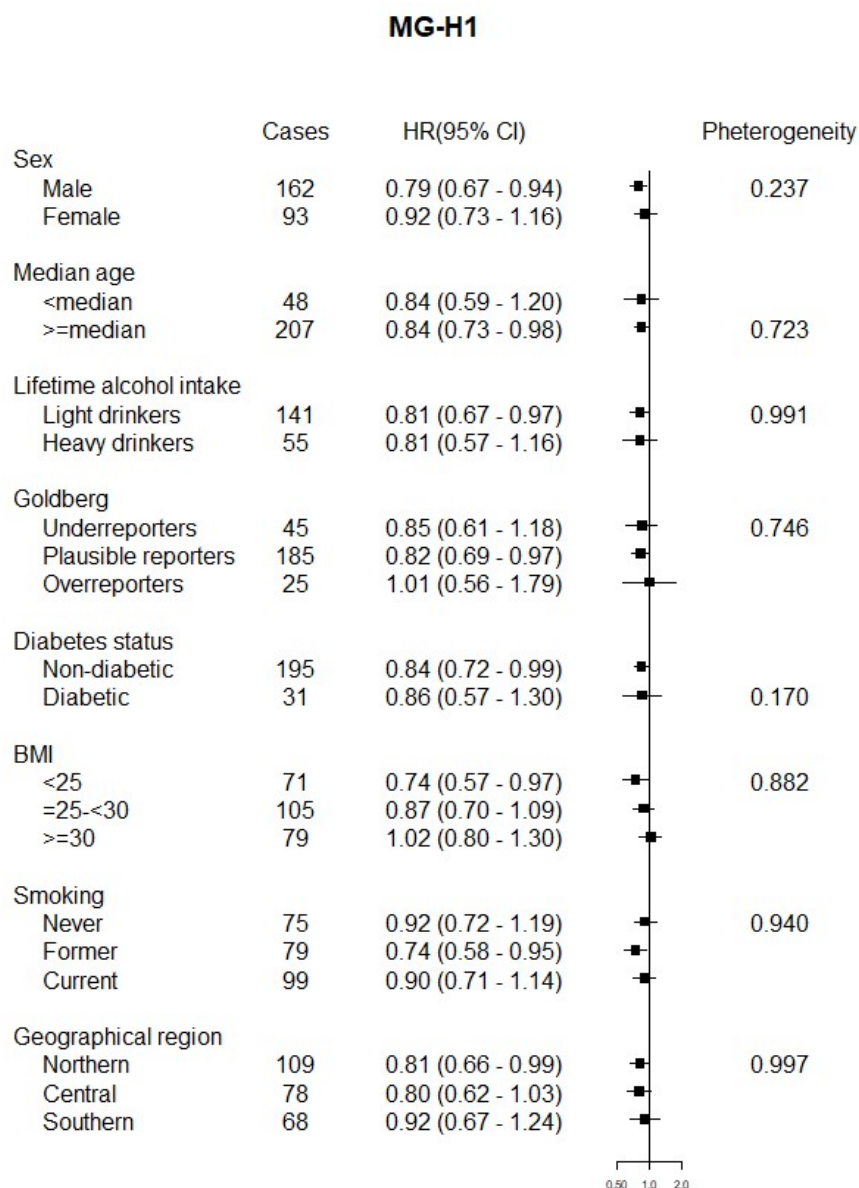

MG-H1, N $\delta$ -[5-hydro-5-methyl-4-imidazolone-2-yl]-ornithine.

<sup>1</sup> Residuals were computed with a linear regression of the ln-transformed intake of AGEs on total energy intake and center.

Geographical region (North: Sweden, Denmark, and Norway; Central: France, the United Kingdom, the Netherlands, and Germany; South: Italy and Spain).

Model 2: main model stratified by sex, center and age in 1-year categories, and adjusted for total energy intake, educational level, body mass index, physical activity, smoking intensity, lifetime and baseline alcohol intake, coffee intake, self-reported diabetes, and fiber intake.

**Supplementary Figure 7.** Subgroup analysis by country showing hazard ratios (HR) and 95% confidence intervals (CI) for hepatocellular carcinoma according to dietary intake of advanced glycation endproducts (AGEs)<sup>1</sup> in the European Prospective Investigation into Cancer and nutrition, 1992-2000 (n=450,111).

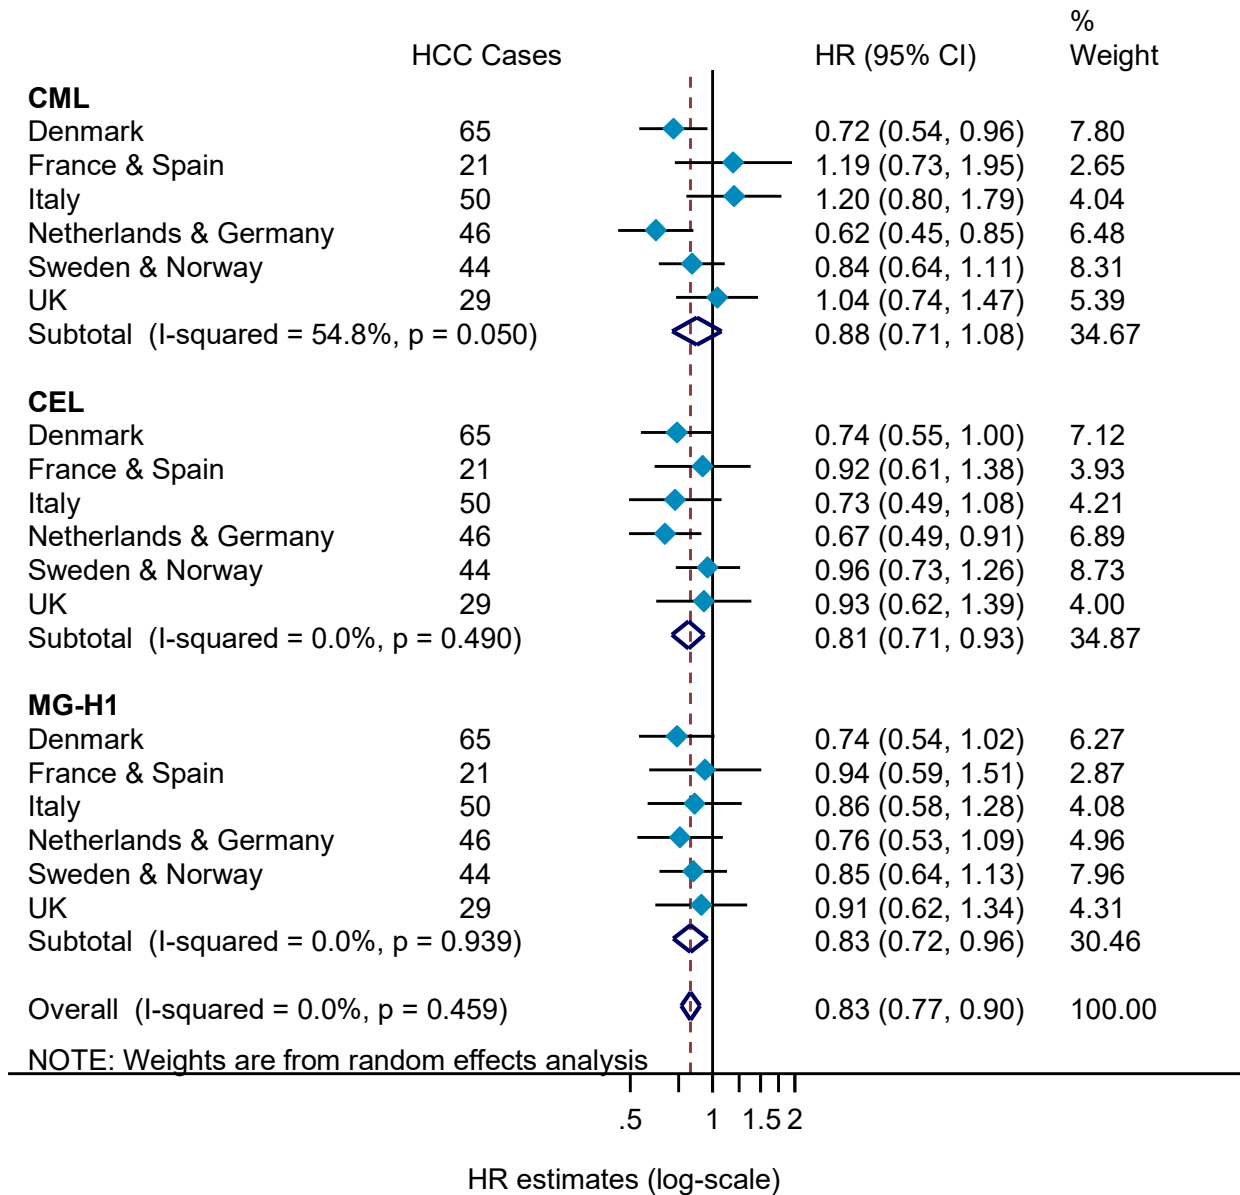

<sup>1</sup> Residuals were computed with a linear regression of the ln-transformed intake of AGEs on total energy intake and center.

**Supplementary Figure 8.** Subgroup analysis by country showing hazard ratios (HR) and 95% confidence intervals (CI) for gallbladder cancer according to dietary intake of advanced glycation endproducts (AGEs)<sup>1</sup> in the European Prospective Investigation into Cancer and nutrition, 1992-2000 (n=450,111).

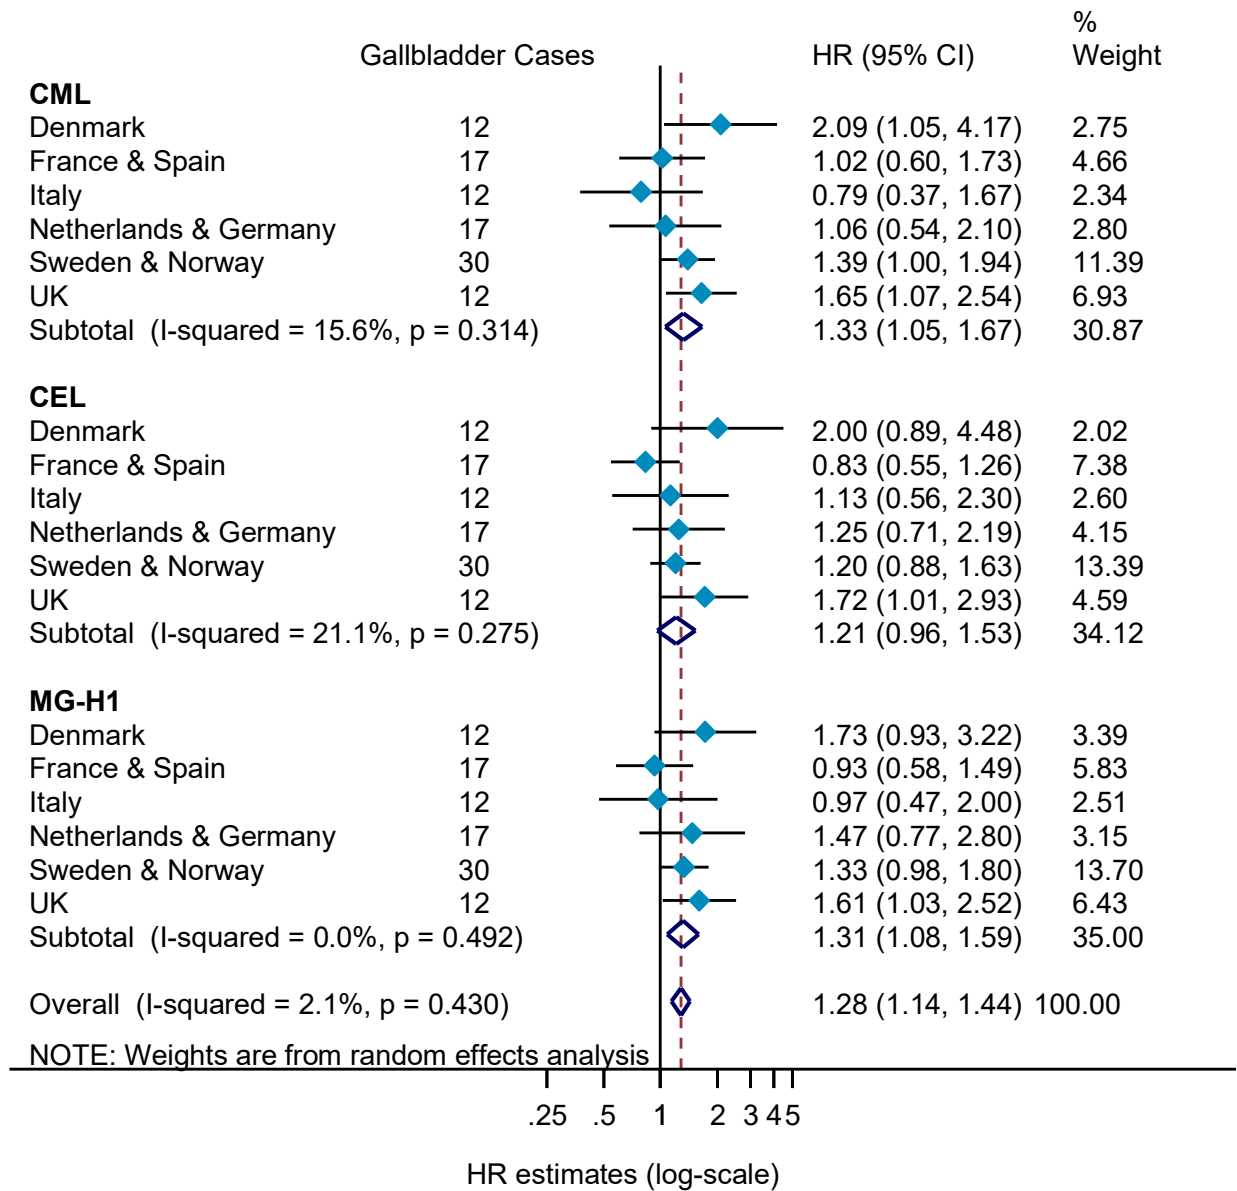

<sup>1</sup> Residuals were computed with a linear regression of the ln-transformed intake of AGEs on total energy intake and center.

**Supplementary Figure 9.** Three-knot spline model for associations between energy-adjusted dietary intake of AGEs and risk of gallbladder cancer.

CML, Nε-[carboxymethyl]lysine; CEL, Nε-[1-carboxyethyl]lysine; MG-H1, Nδ-[5-hydro-5-methyl-4-imidazolone-2-yl]-ornithine.

Hazard ratio (HR) and 95% confidence intervals (black dotted lines) from Cox proportional hazard regression stratified by sex, center and age at recruitment (1-year categories), and adjusted for educational level, body mass index, physical activity, smoking intensity, lifetime and baseline alcohol intake, coffee intake, self-reported diabetes, total energy intake and dietary fiber intake.

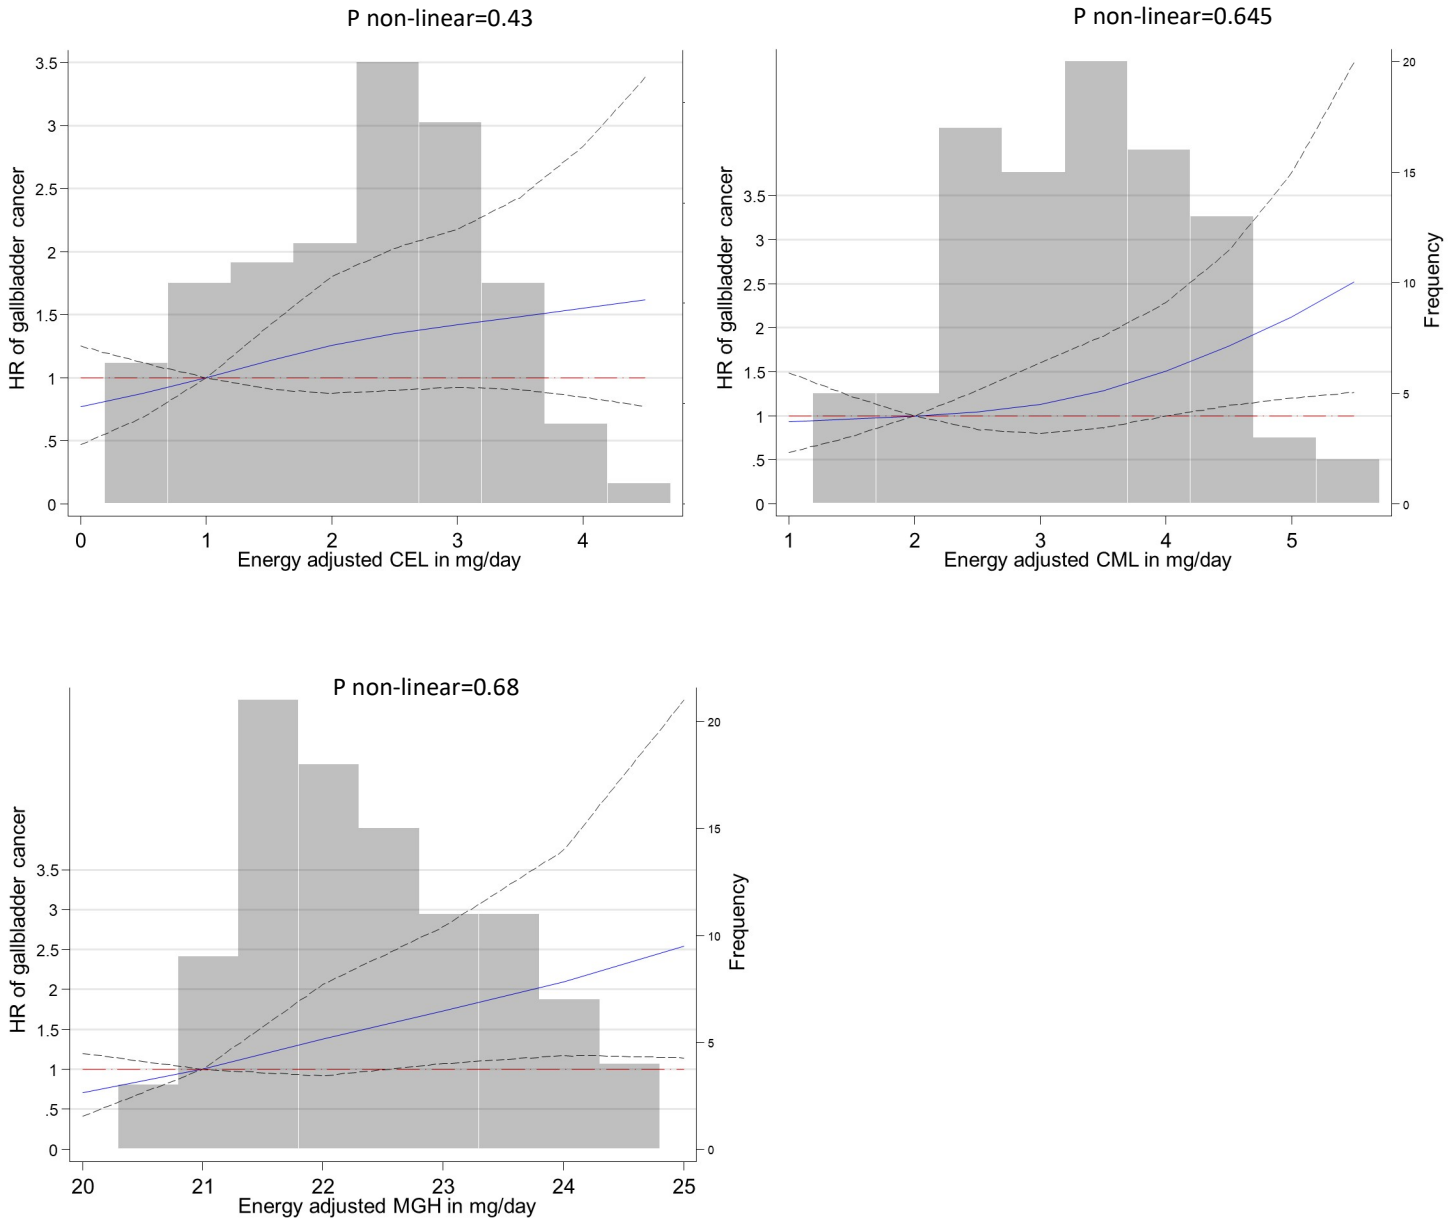

**Supplementary Figure 10.** Associations between dietary AGEs (per 1 SD increment) and HCC censoring every 2 years of follow-up.

CML, N $\epsilon$ -[carboxymethyl]lysine; CEL, N $\epsilon$ -[1-carboxyethyl]lysine; MG-H1, N $\delta$ -[5-hydro-5-methyl-4-imidazolone-2-yl]-ornithine.

Hazard ratio (HR) and 95% confidence intervals from Cox proportional hazard regression stratified by sex, center and age at recruitment (1-year categories), and adjusted for total energy intake, educational level, body mass index, physical activity, smoking intensity, lifetime and baseline alcohol intake, coffee intake, self-reported diabetes, and dietary fiber intake. HR represent the highest tertile of CML, CEL or MG-H1 consumption.

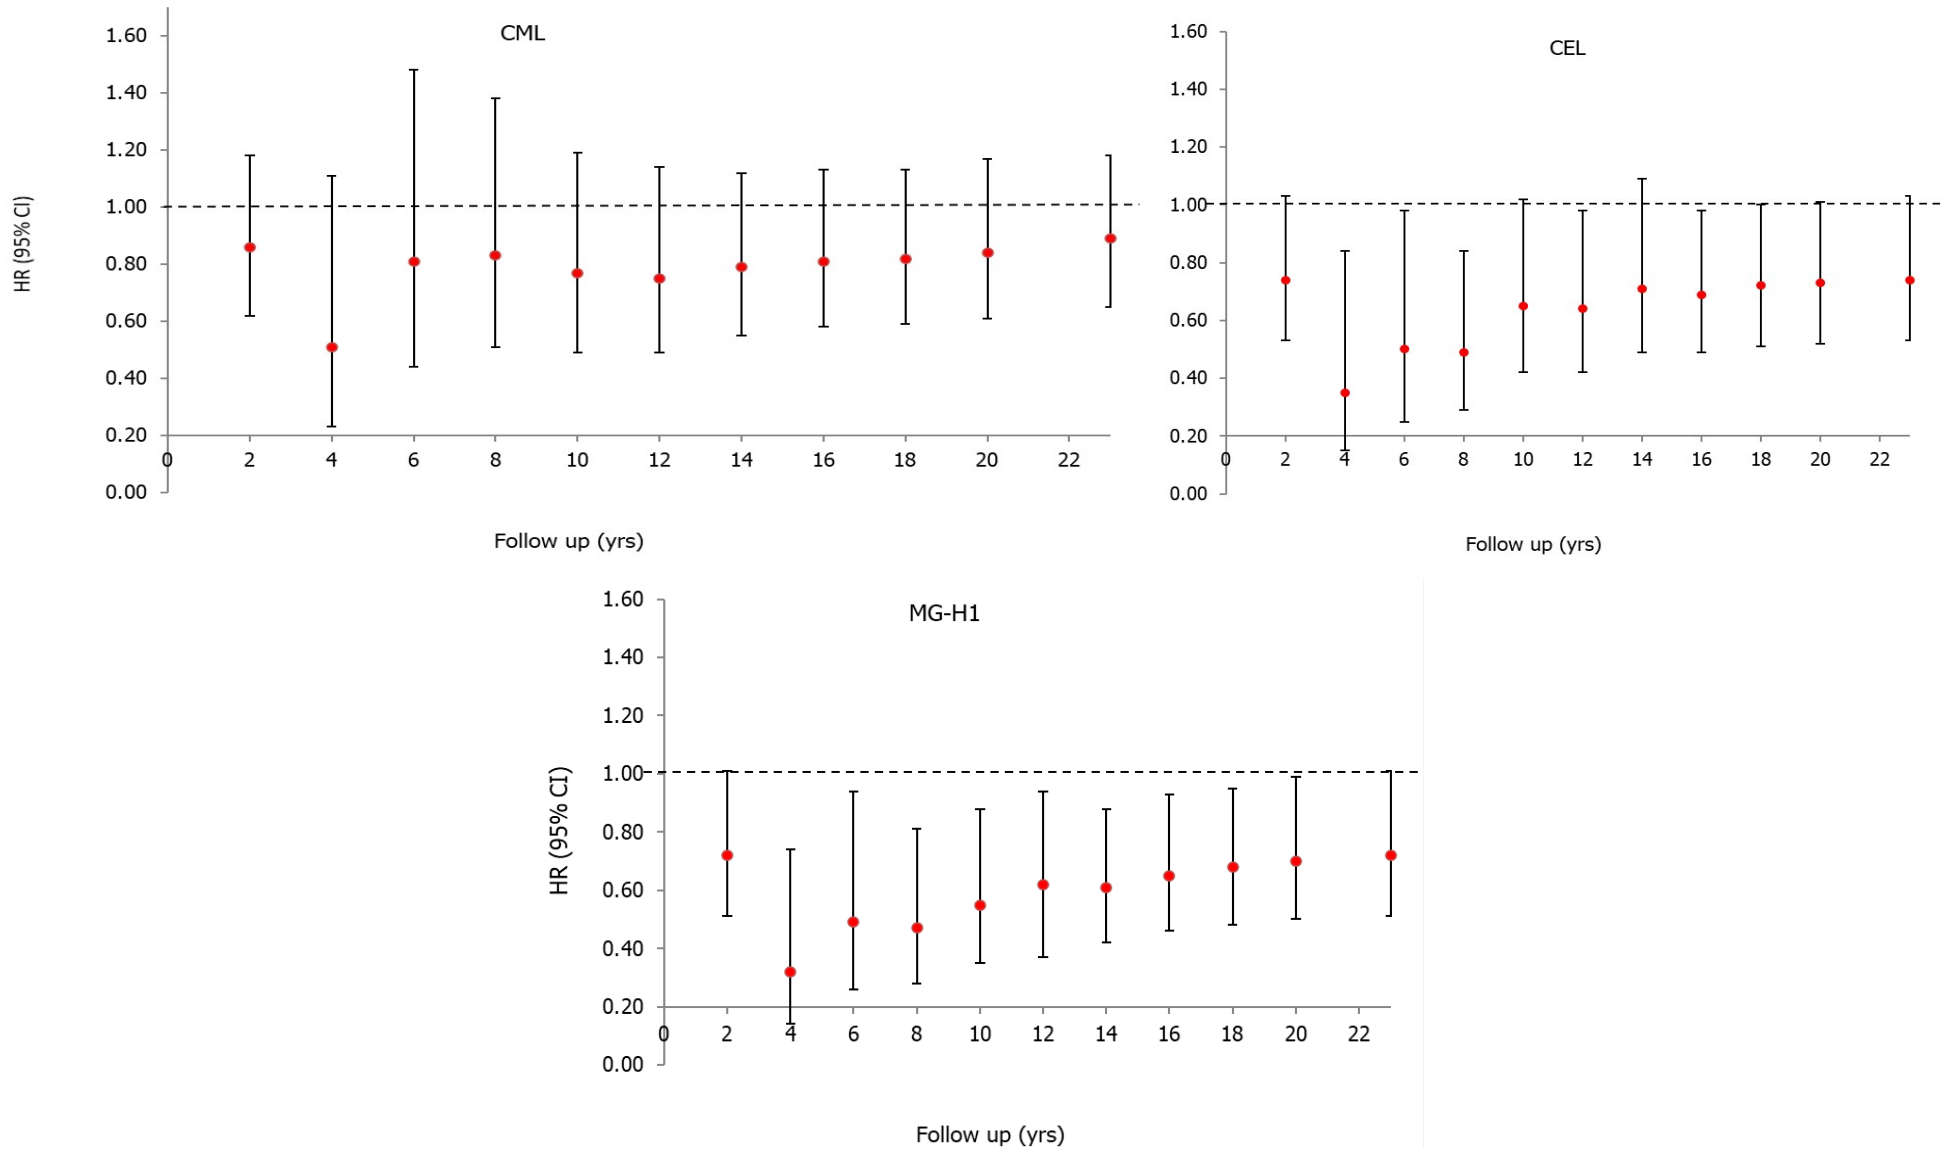

Supplement: IJC-149-854-s001.pdf [file IJC-149-854-s001.pdf]
